# Supplementary material
Source: HighWire-hosted journal article supplement (https://bmjopensem.bmj.com/content/9/2/e001545)
Supplement: inline-supplementary-material-2 [file inline-supplementary-material-2.pdf]

**Supplemental Table 2. Yearly BSI Rates by Institution in Cortical-Rich Bone Sites**

| Phase        | Institution 1 |            |              |      | Institution 2 |            |              |      |
|--------------|---------------|------------|--------------|------|---------------|------------|--------------|------|
|              | N             | BSI Events | Person-Years | Rate | N             | BSI Events | Person-Years | Rate |
| Historical   |               |            |              |      |               |            |              |      |
| Year 1       | 21            | 5          | 17.7         | 0.28 | 14            | 4          | 12.2         | 0.33 |
| Year 2       | 23            | 6          | 20.2         | 0.30 | 13            | 2          | 12.0         | 0.17 |
| Year 3       | 22            | 9          | 19.9         | 0.45 | 10            | 2          | 8.2          | 0.24 |
| Total        | 36            | 20         | 57.8         | 0.35 | 20            | 8          | 32.3         | 0.25 |
| Pilot        |               |            |              |      |               |            |              |      |
| Year 1       | 17            | 2          | 16.7         | 0.12 | 13            | 2          | 11.9         | 0.17 |
| Year 2       | 19            | 6          | 16.5         | 0.36 | 15            | 5          | 13.3         | 0.38 |
| Year 3       | 22            | 4          | 18.1         | 0.22 | 22            | 7          | 18.7         | 0.37 |
| Total        | 31            | 12         | 51.3         | 0.23 | 35            | 14         | 43.8         | 0.32 |
| Intervention |               |            |              |      |               |            |              |      |
| Year 1       | 21            | 5          | 19.0         | 0.26 | 28            | 21         | 23.7         | 0.89 |
| Year 2       | 19            | 3          | 16.5         | 0.18 | 24            | 5          | 21.6         | 0.23 |
| Year 3       | 18            | 1          | 16.3         | 0.06 | 20            | 7          | 18.2         | 0.38 |
| Year 4       | 16            | 0          | 10.4         | 0.00 | 20            | 6          | 11.5         | 0.52 |
| Total        | 34            | 9          | 62.2         | 0.15 | 44            | 39         | 75.1         | 0.52 |
